# Supplementary material for: Seeding African Forest and Landscape Restoration: Evaluating Native Tree Seed Systems in Four African Countries
Source: MDPI journal article supplement (doi:10.3390/d15090981), 2023-08-30
Supplement: s1 [file s1]

Archive with 2 entries (2 files):
- Table S1.pdf
- Table S2.pdf
