# Supplementary material for: Seeding African Forest and Landscape Restoration: Evaluating Native Tree Seed Systems in Four African Countries
Source: MDPI journal article supplement (doi:10.3390/d15090981), 2023-08-30
Supplement: s1 [file s1]

**Table S2:** Average results of the five macro-indicators with standard deviation. The scores can range from 0 (non-existent) to 10 (fully existent).

|                                         | <b>Burkina Faso</b> | <b>Cameroon</b> | <b>Ghana</b> | <b>Kenya</b> |
|-----------------------------------------|---------------------|-----------------|--------------|--------------|
| <i>Selection and innovation</i>         | 4.6 ±0.6            | 4.8 ±0.5        | 4.3 ±0.3     | 4.2 ±0.8     |
| <i>Seed harvesting and production</i>   | 3.4 ±0.8            | 3.6 ±1.1        | 4.5 ±0.1     | 3.9 ±0.7     |
| <i>Market access, supply and demand</i> | 4.3 ±0.2            | 4.3 ±1.4        | 4.9 ±0.5     | 5.3 ±2.2     |
| <i>Quality control</i>                  | 4.0 ±0.5            | 3.1 ±0.6        | 3.4 ±0.2     | 4.6 ±0.4     |
| <i>Enabling environment</i>             | 3.2 ±0.3            | 2.7 ±1.2        | 3.8 ±0.5     | 2.8 ±0.5     |
